# Supplementary material for: Narrow-band red phosphors of high colour purity based on Eu3+-activated apatite-type Gd9.33(SiO4)6O2
Source: Royal Society of Chemistry journal article supplement (doi:10.1039/d1tc01330k), 2021-01-01
Supplement: d1tc01330k1.pdf [file d1tc01330k1.pdf]

## Supporting Information

### Narrow-band red phosphors of high colour purity based on Eu<sup>3+</sup>-activated apatite-type Gd<sub>9.33</sub>(SiO<sub>4</sub>)<sub>6</sub>O<sub>2</sub>

Melissa M. Rodríguez-García,<sup>†</sup> Aleksandar Ciric<sup>‡</sup>, Zoran Ristic,<sup>‡</sup> J. A. G. Williams,<sup>†</sup> Miroslav D. Dramićanin<sup>\*,‡</sup> and Ivana Radosavljevic Evans<sup>\*,†</sup>

<sup>†</sup>Department of Chemistry, Durham University, Durham DH1 3LE, UK.

<sup>‡</sup>Institute of Nuclear Sciences “Vinča,” – The National Institute of the Republic of Serbia, University of Belgrade, P.O. Box 522, 11001 Belgrade, Serbia

**Table S1.** Summary of <sup>5</sup>D<sub>0</sub> → <sup>7</sup>F<sub>J</sub> transitions observed in luminescence spectra of Eu<sup>3+</sup>-doped phosphors.

| Transition                                                | Dipole character | Range (nm) | Characteristic                                                                        |
|-----------------------------------------------------------|------------------|------------|---------------------------------------------------------------------------------------|
| <sup>5</sup> D <sub>0</sub> → <sup>7</sup> F <sub>0</sub> | ED               | 570–585    | Only observed for C <sub>n</sub> , C <sub>nv</sub> and C <sub>s</sub> site symmetries |
| <sup>5</sup> D <sub>0</sub> → <sup>7</sup> F <sub>1</sub> | MD               | 585–600    | Independent of environment                                                            |
| <sup>5</sup> D <sub>0</sub> → <sup>7</sup> F <sub>2</sub> | ED               | 610–630    | Strongly dependent on environment                                                     |
| <sup>5</sup> D <sub>0</sub> → <sup>7</sup> F <sub>3</sub> | ED               | 640–660    | Forbidden transition                                                                  |
| <sup>5</sup> D <sub>0</sub> → <sup>7</sup> F <sub>4</sub> | ED               | 680–710    | Intensity dependent on environment                                                    |
| <sup>5</sup> D <sub>0</sub> → <sup>7</sup> F <sub>5</sub> | ED               | 740–770    | Forbidden transition                                                                  |
| <sup>5</sup> D <sub>0</sub> → <sup>7</sup> F <sub>6</sub> | ED               | 810–840    | Rarely measured and observed                                                          |

**Table S2.** Stark sublevels according to the site symmetry of the Eu<sup>3+</sup> doping site.<sup>8</sup>

| Site symmetry                                                                                                             | Integer J |   |   |   |   |    |    |  |
|---------------------------------------------------------------------------------------------------------------------------|-----------|---|---|---|---|----|----|--|
|                                                                                                                           | 0         | 1 | 2 | 3 | 4 | 5  | 6  |  |
| T, T <sub>d</sub> , T <sub>h</sub> , O, O <sub>h</sub>                                                                    | 1         | 1 | 2 | 3 | 4 | 4  | 6  |  |
| C <sub>3h</sub> , D <sub>3h</sub> , C <sub>6</sub> , C <sub>6h</sub> , C <sub>6v</sub> , D <sub>6</sub> , D <sub>6h</sub> | 1         | 2 | 3 | 5 | 6 | 7  | 9  |  |
| C <sub>3</sub> , S <sub>6</sub> , C <sub>3v</sub> , D <sub>3</sub> , D <sub>3d</sub>                                      | 1         | 2 | 3 | 5 | 6 | 7  | 9  |  |
| C <sub>4</sub> , S <sub>4</sub> , C <sub>4h</sub> , C <sub>4v</sub> , D <sub>4</sub> , D <sub>2d</sub> , D <sub>4h</sub>  | 1         | 3 | 4 | 5 | 7 | 8  | 10 |  |
| C <sub>1</sub> , C <sub>s</sub> , C <sub>2</sub> , C <sub>2h</sub> , C <sub>2v</sub> , D <sub>2</sub> , D <sub>2h</sub>   | 1         | 3 | 5 | 7 | 9 | 11 | 13 |  |

**Table S3.** Unit cell parameters for Gd<sub>9.33-x</sub>Eu<sub>x</sub>(SiO<sub>4</sub>)<sub>6</sub>O<sub>2</sub> phosphors.

| x    | a (Å)      | c (Å)       | V (Å <sup>3</sup> ) | R <sub>wp</sub> (%) | Gd <sub>2</sub> SiO <sub>5</sub> (%) |
|------|------------|-------------|---------------------|---------------------|--------------------------------------|
| 0.03 | 9.44114(8) | 6.869868(8) | 530.31(1)           | 2.28                | 2.7(8)                               |
| 0.05 | 9.4392(1)  | 6.8699(1)   | 530.09(2)           | 2.84                | 2.6(9)                               |
| 0.07 | 9.44102(8) | 6.86960(8)  | 530.27(1)           | 2.45                | 2(1)                                 |
| 0.09 | 9.4399(1)  | 6.8710(1)   | 530.26(2)           | 2.71                | 4.2(6)                               |
| 0.19 | 9.4403(2)  | 6.8715(2)   | 530.34(2)           | 2.93                | 3.5(8)                               |
| 0.28 | 9.4404(1)  | 6.8703(1)   | 530.25(2)           | 3.12                | 6.3(8)                               |

|      |           |           |           |      |        |
|------|-----------|-----------|-----------|------|--------|
| 0.47 | 9.4444(1) | 6.8709(1) | 530.76(2) | 2.94 | 0.2(4) |
| 0.65 | 9.4432(1) | 6.8714(1) | 530.65(2) | 2.99 | 8(1)   |
| 0.93 | 9.4440(1) | 6.8714(1) | 530.75(2) | 3.52 | 3.9(9) |
| 1.4  | 9.4451(2) | 6.8760(2) | 531.23(3) | 3.8  | 8(1)   |
| 1.87 | 9.4464(1) | 6.8778(1) | 531.51(2) | 3.07 | 8.0(8) |

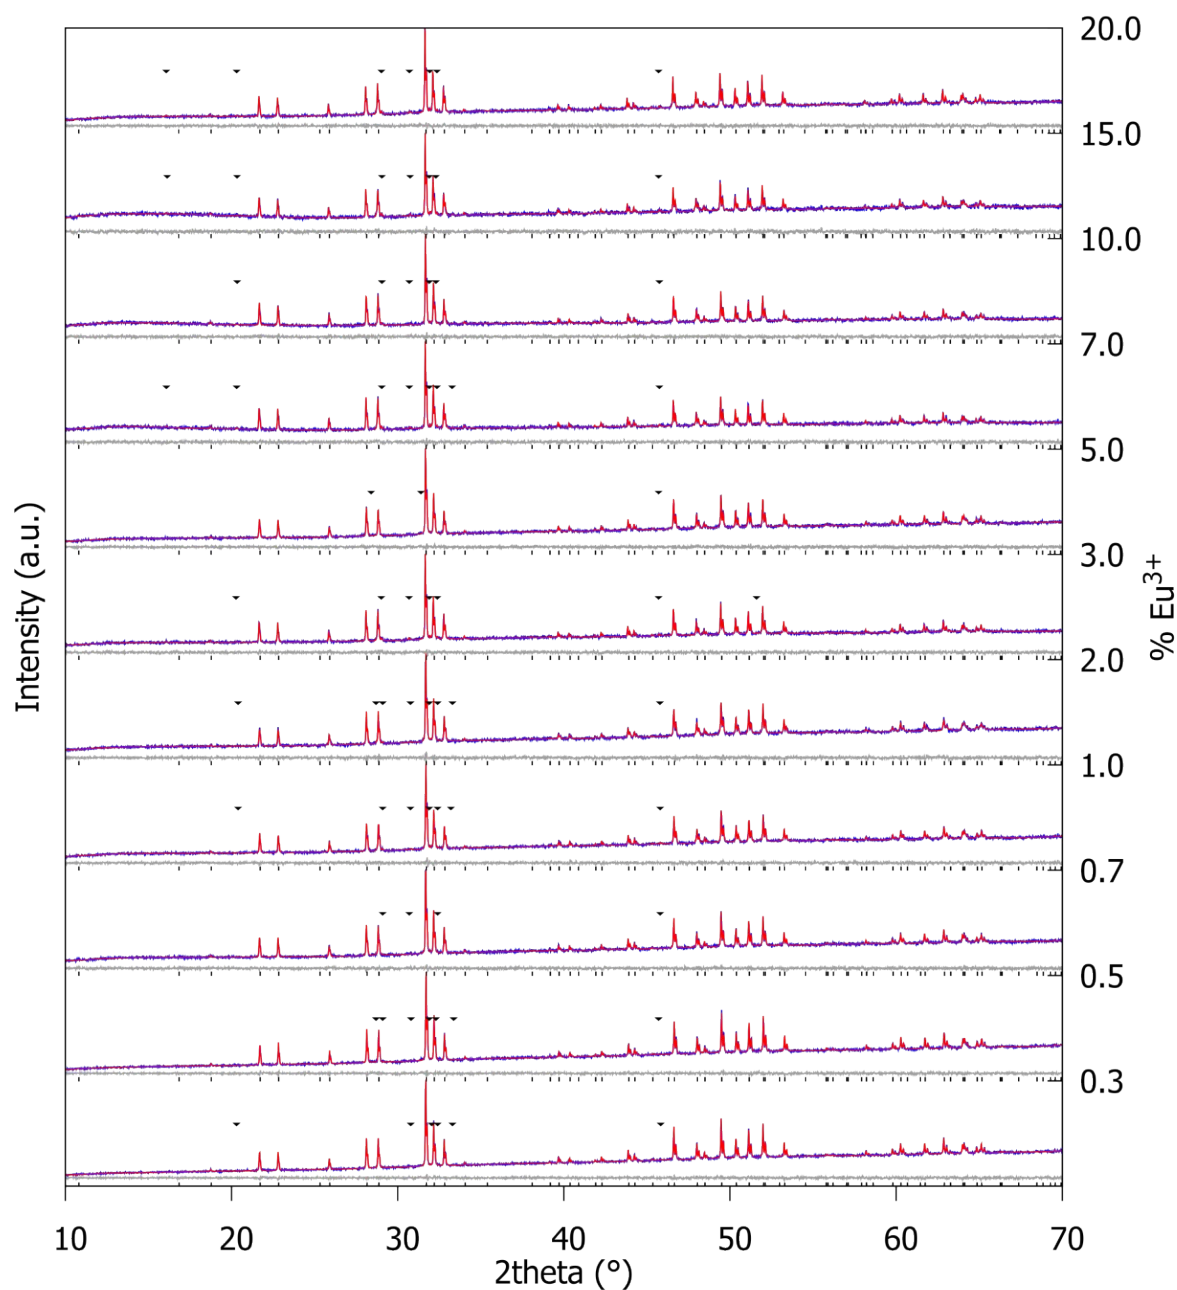

**Figure S1.** Rietveld fit of the laboratory PXRD data.  $\text{Gd}_{9.33-x}\text{Eu}_x(\text{SiO}_4)_6\text{O}_2$  ( $x = 0.03, 0.05, 0.07, 0.09, 0.19, 0.28, 0.47, 0.65, 0.93, 1.40$  and  $1.87$ ).  $\nabla$  indicates the  $\text{Gd}_2\text{SiO}_5$  impurity peaks.

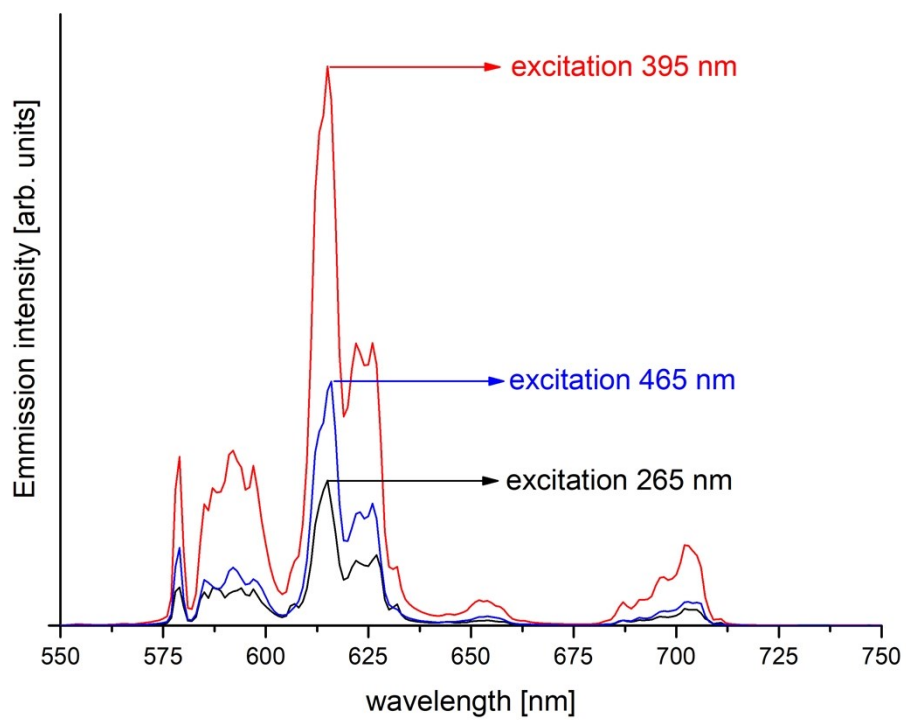

**Figure S2.** Room-temperature emission spectra of  $\text{Gd}_{9.05}\text{Eu}_{0.28}(\text{SiO}_4)_6\text{O}_2$  recorded after excitation into the CT band at 265, 396 and 465 nm.

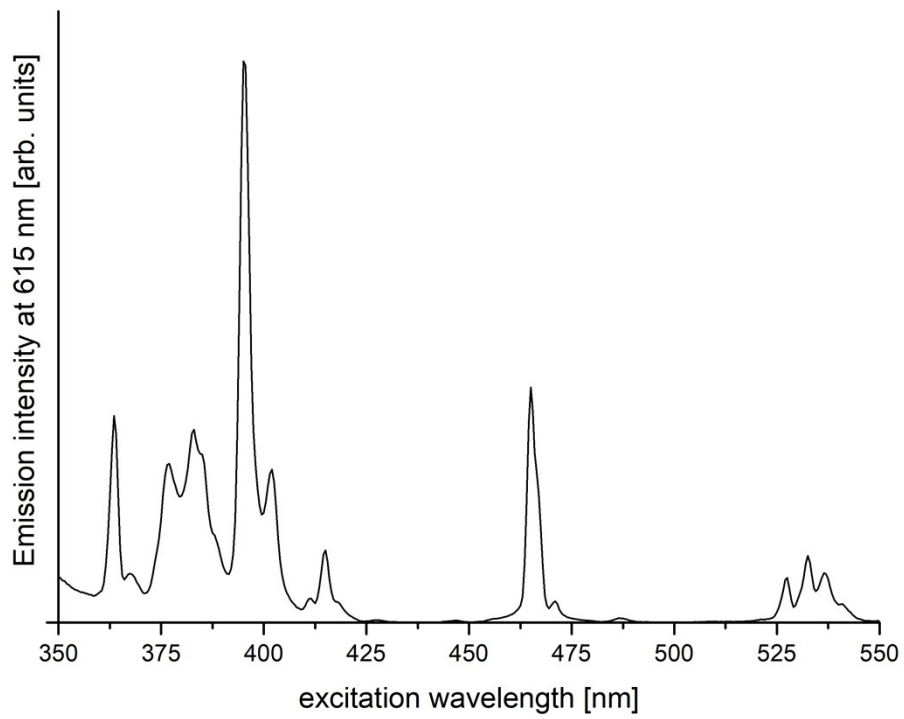

**Figure S3.** Room-temperature PL excitation spectrum of  $\text{Gd}_{9.05}\text{Eu}_{0.28}(\text{SiO}_4)_6\text{O}_2$  recorded in the near UV and blue spectral region.

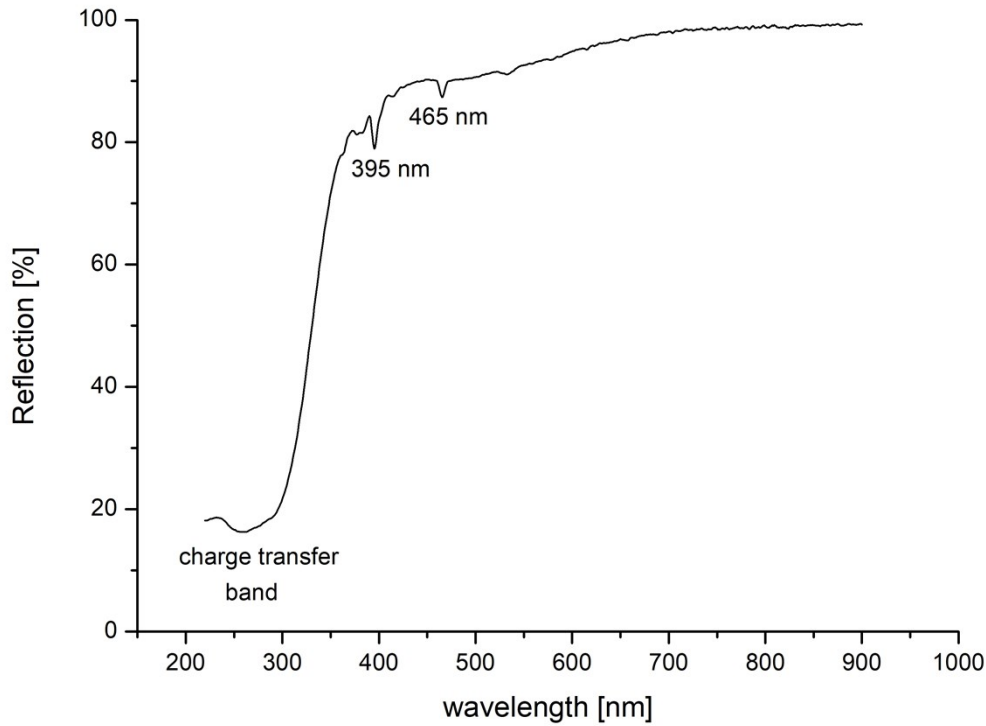

**Figure S4.** UV-Vis diffuse reflectance spectroscopy (UV-Vis DRS) spectra of  $\text{Gd}_{9.33}(\text{SiO}_4)_6\text{O}_2$  phosphor host.

**Table S4.** Thermal expansion coefficients for  $\text{Gd}_{9.05}\text{Eu}_{0.28}(\text{SiO}_4)_6\text{O}_2$  phosphors.

|                               |             | $T_0$ (°C) | $T_f$ (°C) | $L_0$ (Å) | $L_f$ (Å) |
|-------------------------------|-------------|------------|------------|-----------|-----------|
| $\alpha_a$ (C <sup>-1</sup> ) | 8.97(9)E-06 | 30         | 500        | 9.4402(1) | 9.4800(1) |
| $\alpha_c$ (C <sup>-1</sup> ) | 5.9(1)E-06  | 30         | 500        | 6.8695(1) | 6.8886(1) |
| $\alpha_V$ (C <sup>-1</sup> ) | 2.4(2)E-05  | 30         | 500        | 530.17(2) | 536.14(2) |

### S1. Judd-Ofelt analysis

The  $\text{Eu}^{3+}$  ion ( $4f_6$  electron shell) has a very special characteristic: its magnetic dipole (MD)  $^5D_0 \rightarrow ^7F_1$  transition that has a dipole strength which is independent of the environment. Therefore, the dipole strength ( $D_{MD}$ ) can be calculated and used as a reference for transitions originating from the  $^5D_0$  level<sup>6, 11</sup>:

$$D_{MD} = 9.6 \times 10^{-42} \text{esu}^2 \text{cm}^2 = 9.6 \times 10^{-6} \text{Debye}^2, \quad (1)$$

where  $1 \text{esu} = \text{N}^{-5/2} \text{cm}$ .

The elements of the reduced matrix ( $U^\lambda$ ) for electric dipole (ED) transitions originating from  $^5D_0$  are zero, with the exception of levels  $^7F_\lambda$  ( $\lambda = 2, 4, 6$ ), where  $U^2 = 0.0032$ ,  $U^4 = 0.0023$  and  $U^6 = 0.0002$ .<sup>12</sup> The Judd-Ofelt parameters (Equation 2) can be calculated from the ratio of the integrated emission intensity arising from the  $^5D_0 \rightarrow ^7F_\lambda$  ( $\lambda = 2, 4, 6$ ) and the MD  $^5D_0 \rightarrow ^7F_1$  transitions.<sup>12</sup>

$$\Omega_{\lambda} = \frac{D_{MD} \tilde{\nu}_1^3}{e^2 \tilde{\nu}_{\lambda}^3 U^{\lambda} n_{\lambda} (n_{\lambda}^2 + 2)^2 J_1} \quad (2)$$

where  $\Omega_{\lambda}$  are the Judd-Ofeld parameters,  $n$  is the refractive index,  $J_{\lambda}$  is the integrated intensity of the  ${}^5D_0 \rightarrow {}^7F_{\lambda}$  transition and  $\tilde{\nu}_{\lambda}$  is the average wavenumber of the transition to the  ${}^7F_{\lambda}$  level.

The ratio of the radiative transition probabilities  $A_{\lambda}$  of the  ${}^5D_0 \rightarrow {}^7F_{\lambda}$  ( $\lambda = 2, 4, 6$ ) transitions to the  $A_1$  of the  ${}^5D_0 \rightarrow {}^7F_1$  can be expressed in terms of the ratio of the area  $S$  under the respective emission peak,s as given by: <sup>13</sup>

$$\frac{A_{\lambda}({}^5D_0 \rightarrow {}^7F_{\lambda})}{A_1({}^5D_0 \rightarrow {}^7F_1)} = \frac{S({}^5D_0 \rightarrow {}^7F_{\lambda})}{S({}^5D_0 \rightarrow {}^7F_1)}, \quad (3)$$

where

$$A_1 = \frac{64\pi^4 \tilde{\nu}_1^3}{3h} n_1^3 D_{MD}, \quad (4)$$

$$A_{\lambda} = \frac{64\pi^4 \tilde{\nu}_{\lambda}^3 n_{\lambda} (n_{\lambda}^2 + 2)^2}{3h \cdot 9} D_{ED}^{\lambda} \quad (5)$$

and  $h$  is the Planck constant ( $6.63 \times 10^{-32}$  N cm).

The theoretical lifetime is obtained from the emission spectrum. The theoretical equation though an approximation, allows the radiative decay to be calculated by means of the emission spectrum, as in Equation 7 <sup>14</sup>:

$$\tau_{theo} = \frac{n_1^{-3} J_1}{14.65 J_T}, \quad (7)$$

where  $J_T$  is the total integrated intensity of the emission spectra. The branching ratios (Equation 8) can be used to predict the relative intensity of an emission originating from the  ${}^5D_0$  level.

$$\beta_{\lambda} = \frac{J_{\lambda}}{J_T} \quad (8)$$

The intrinsic quantum yield,  $\eta$ , is the ratio of the number of photons emitted to the number of photons absorbed. This can be calculated from the direct observed lifetime and the lifetime calculated from the emission spectrum using Equation 9:

$$\eta = \frac{\tau_{obs}}{\tau_{exp.}} \quad (9)$$

**Table S5.** Judd-Ofeld parameters, radiative transition possibilities of  ${}^5D_0 \rightarrow {}^7F_{\lambda}$  ( $\lambda = 1, 2, 4$ ) transitions, radiative theoretical and experimental lifetime values for the  $Gd_{9.05}Eu_{0.28}(SiO_4)_6O_2$  phosphors at different temperatures.

| Temperature<br>(°C) | $\Omega_2$<br>(cm <sup>2</sup> ) | $\Omega_4$<br>(cm <sup>2</sup> ) | $A_1$<br>(s <sup>-1</sup> ) | $A_2$<br>(s <sup>-1</sup> ) | $A_4$<br>(s <sup>-1</sup> ) | $\tau_{rad}$<br>(ms) |
|---------------------|----------------------------------|----------------------------------|-----------------------------|-----------------------------|-----------------------------|----------------------|
|                     |                                  |                                  |                             |                             |                             |                      |

|     |      |      |       |        |       |      |
|-----|------|------|-------|--------|-------|------|
| 25  | 7.28 | 3.01 | 84.43 | 391.71 | 80.18 | 1.77 |
| 50  | 7.25 | 3.03 | 84.43 | 389.96 | 80.75 | 1.71 |
| 75  | 7.23 | 3.05 | 84.44 | 388.83 | 81.1  | 1.71 |
| 100 | 7.11 | 3.01 | 84.44 | 382.3  | 80    | 1.79 |
| 125 | 7.15 | 3.06 | 84.45 | 384.22 | 81.36 | 1.78 |
| 150 | 7.05 | 3.05 | 84.47 | 378.99 | 81.27 | 1.73 |
| 175 | 6.89 | 3.03 | 48.48 | 370.42 | 80.69 | 1.76 |
| 200 | 6.68 | 3.07 | 84.49 | 358.77 | 81.67 | 1.79 |
| 225 | 6.28 | 2.98 | 84.51 | 337.58 | 79.31 | 1.88 |
| 250 | 5.86 | 3    | 84.53 | 315.01 | 79.92 | 1.96 |
| 275 | 5.42 | 3    | 84.55 | 291.3  | 80    | 2.06 |
| 300 | 5.42 | 3.02 | 84.57 | 270.58 | 80.74 | 2.14 |
| 325 | 4.63 | 3.05 | 84.59 | 249.05 | 81.44 | 2.24 |
| 350 | 4.32 | 3.1  | 84.62 | 231.94 | 82.89 | 2.3  |
| 375 | 4.03 | 3.16 | 84.64 | 216.2  | 84.7  | 2.36 |
| 400 | 3.83 | 3.23 | 84.65 | 205.3  | 86.71 | 2.39 |
| 425 | 3.68 | 3.25 | 84.67 | 196.77 | 87.33 | 2.43 |
| 450 | 3.57 | 3.23 | 84.69 | 190.79 | 86.67 | 2.46 |
| 475 | 3.48 | 3.25 | 84.7  | 185.86 | 87.16 | 2.47 |
